# Supplementary material for: A study on value addition of cow dung-based anaerobic sludge for biomethane and bio-oil production via co-liquefaction with rice straw and clam shells as a catalyst
Source: Royal Society of Chemistry journal article supplement (doi:10.1039/d4ra00794h), 2024-01-01
Supplement: d4ra00794h1.pdf [file d4ra00794h1.pdf]

### Nomenclature table

| <b>Acronym</b>       | <b>Abbreviation</b>                        |
|----------------------|--------------------------------------------|
| GC-MS                | Gas Chromatography Mass Spectroscopy       |
| C/N                  | Carbon / Nitrogen ratio                    |
| TSS                  | Total Suspended Solids                     |
| VS                   | Volatile Solids                            |
| MW                   | Mega Watts                                 |
| NaOH                 | Sodium Hydroxide                           |
| FT-IR                | Fourier Transform InfraRed spectroscopy    |
| HTL                  | Hydrothermal liquefaction                  |
| HCl                  | Hydrochloric acid                          |
| Ca (OH) <sub>2</sub> | Calcium hydroxide                          |
| COD                  | Chemical Oxygen Demand                     |
| CHNS                 | Carbon Hydrogen Nitrogen Sulphur           |
| ASTM                 | American Society for Testing and Materials |
| TGA                  | Thermo-gravimetric analyser                |
| RS                   | Rice straw                                 |
| AS                   | Anaerobic sludge                           |
| CD                   | Cow dung                                   |
| HHV                  | Higher heating value                       |
| FID                  | Flame ionization detector                  |
| SEM                  | Scanning Electron Microscope               |
| BET                  | Brunauer-Emmett-Teller                     |
